# Supplementary material for: A Systematic Review and Meta-Analysis of Free Triiodothyronine (FT3) Levels in Humans Depending on Seasonal Air Temperature Changes: Is the Variation in FT3 Levels Related to Nonshivering Thermogenesis?
Source: MDPI journal article supplement (doi:10.3390/ijms241814052), 2023-09-13
Supplement: s1 [file s1]

## Supplementary materials

Table S1. Quality score of the included studies.

| Study                     | Representativeness<br>of the exposed<br>cohort | Selection of the<br>non-exposed<br>cohort | Ascertainment<br>of exposure | Demonstration<br>that outcome of<br>interest was not<br>present at start<br>of study | Compare<br>ability of<br>cohorts on the<br>basis of the<br>design or<br>analysis | Assessment of<br>outcome | Was follow up<br>long enough<br>for outcomes<br>to occur | Adequacy of<br>follow up of<br>cohorts | Total score | Power        |
|---------------------------|------------------------------------------------|-------------------------------------------|------------------------------|--------------------------------------------------------------------------------------|----------------------------------------------------------------------------------|--------------------------|----------------------------------------------------------|----------------------------------------|-------------|--------------|
| Reed et al.,<br>1988      |                                                |                                           | *                            | *                                                                                    | *                                                                                | *                        | *                                                        | *                                      | 6*          | Fair quality |
| Reed et al.,<br>1990b     |                                                |                                           | *                            | *                                                                                    | *                                                                                | *                        | *                                                        | *                                      | 6*          | Fair quality |
| Hassi et al.,<br>2001     | *                                              | *                                         | *                            | *                                                                                    | *                                                                                | *                        | *                                                        | *                                      | 8*          | Good quality |
| Leonard et al.,<br>2014   | *                                              | *                                         | *                            | *                                                                                    | *                                                                                | *                        | *                                                        | *                                      | 8*          | Good quality |
| Levy et al.,<br>2013      | *                                              | *                                         | *                            | *                                                                                    | *                                                                                | *                        | *                                                        | *                                      | 8*          | Good quality |
| Mahwi et al.,<br>2019     | *                                              | *                                         | *                            | *                                                                                    | *                                                                                | *                        | *                                                        | *                                      | 8*          | Good quality |
| Zeng et al.,<br>2021      | *                                              | *                                         | *                            | *                                                                                    | *                                                                                | *                        | *                                                        | *                                      | 8*          | Good quality |
| Jang et al.,<br>2008      | *                                              | *                                         | *                            | *                                                                                    | *                                                                                | *                        | *                                                        | *                                      | 8*          | Good quality |
| Del Ponte et<br>al., 1984 |                                                | *                                         | *                            | *                                                                                    | *                                                                                | *                        | *                                                        | *                                      | 7*          | Good quality |
| Gullo et al.,<br>2017     | *                                              | *                                         | *                            | *                                                                                    | *                                                                                | *                        | *                                                        | *                                      | 8*          | Good quality |

**Note.** \* - one score.
